# Supplementary material for: Near-IR wide-field-of-view Huygens metalens for outdoor imaging applications
Source: publisher site journal article supplement (doi:10.1515/nanoph-2019-0177), 2019-08-10
Supplement: Supplementary file 1 [file nanoph-2019-0177_suppl.docx]

**Supplementary Materials**

# Supplementary Figures


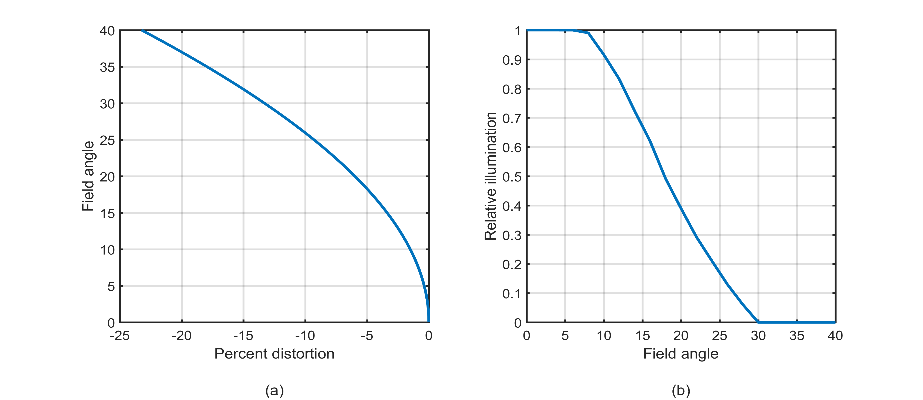


**Fig. S1. Distortion and illumination.** Zemax simulation results for (a) Percent distortion as a function of field angle. (b) Relative illumination as a function of field angle, for metalens of 2mm diameter.


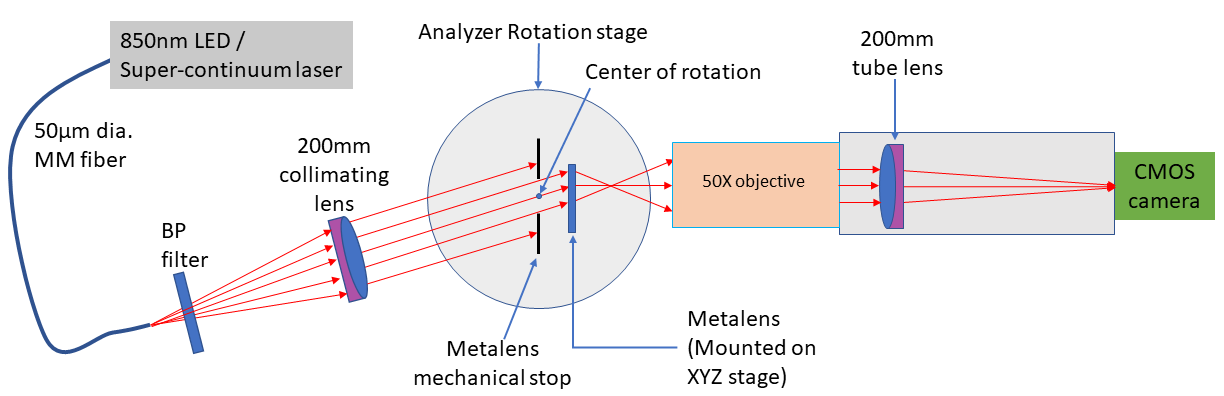


**Fig. S2.** MTF measurement setup

**
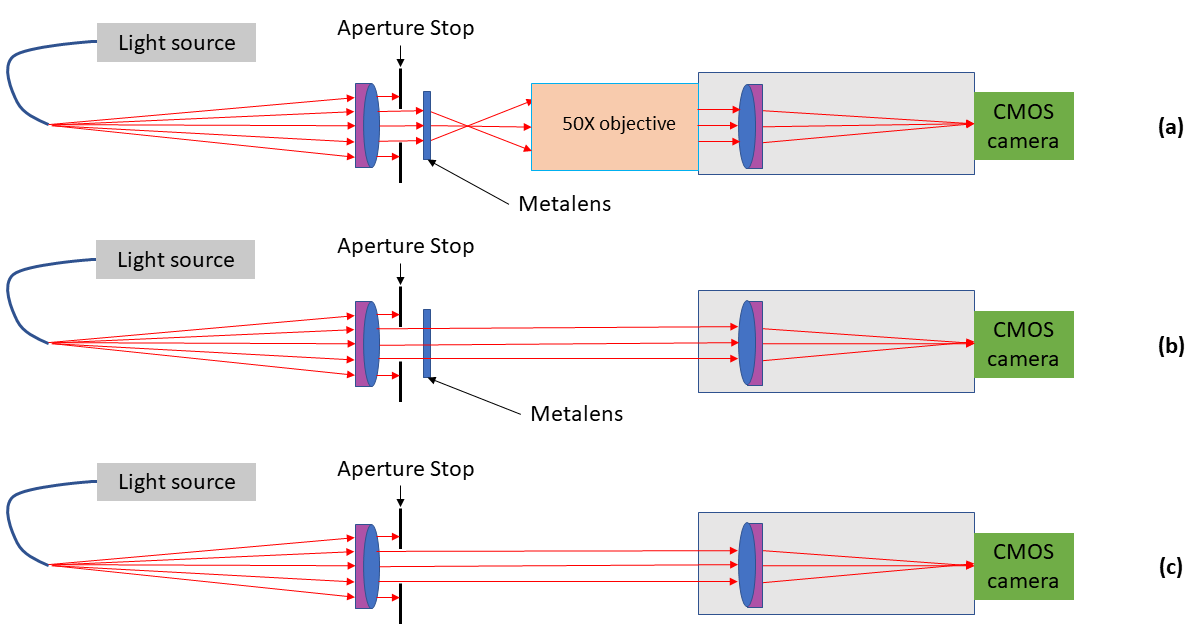
**

**Fig. S3** Diffraction efficiency measurement using MTF setup

# Choosing the lattice period

There are two primary factors limiting the maximum lattice period that can be used in a metasurface:

(a) The period must be sufficiently small so that only the zero diffraction order will exist [1].

(b) The period must be sufficiently small to allow good spatial sampling of the desired phase pattern on the lens [2].

Considerations (a) and (b) can be quantitatively analyzed using the grating equation [3]:

|  |  | (2) |
| --- | --- | --- |

Where *n, n’* are the refractive indices in the incident and transmitted medium respectively, *θ, θ’* are the incident and diffracted beam angles, *m* is the order of diffraction, *λ* is the wavelength, and *d* is the grating period.

This equation can be written in alternative form in k-vector space, if we multiply both sides by 2π/λ. In this way we obtain [4]:

|  |  | (3) |
| --- | --- | --- |

Where *ky* represents the tangential component of the input wave-vector, *k’y* is the same for the output, and *KG* is the grating wavenumber, defined as .

Sub-wavelength criterion

The borderline situation when only the zero order will propagate, is when for one of the first orders (±1), *θ’=±90˚* (while for the other first order, there will be no solution for θ’). To simplify a bit, we will consider a situation in which *n’=n* (can be realized by immersing the nano-antennas in a polymer, index-matched to the substrate). We substitute these requirements, and *m=1*, into equation 2, to obtain:

|  |  | (4) |
| --- | --- | --- |

We will choose the sign of 1 to be positive, so that *d* will be positive. If we denote the incidence angle of the beam in air, before entering the substrate, as *ϕ*, we can substitute Snell’s law and write:

|  |  | (5) |
| --- | --- | --- |

For a metalens working at infinite conjugate, *ϕ* is the field angle of the lens, and *n* is the refractive index of the substrate.

Phase sampling criterion

The diffraction efficiency of a multilevel phase grating is given by , where N is the number of phase levels, and the sinc function is defined as  [5]. From here we obtain an efficiency of 40.5% for two phase levels, 81% for 4 levels, and 95% for 8 levels. In the case of a metalens, we have a varying phase function period, so we must decide what our sampling criterion is. In  [2] the criterion used is “Nyquist” level sampling at the edge of the metalens, i.e. 2 phase samples at the edge of the lens, where the period is smallest. Since two phase levels provide only 40.5% efficiency we preferred to use a criterion of 4 phase samples [6].

The maximum lattice period from the phase sampling point-of-view, can be found based on the phase function of the metalens. The local grating period of a first-order diffractive lens is given by [7]:

|  |  | (6) |
| --- | --- | --- |

Where *ϕ(r)* is the radial phase function of the lens, which in the case of our metalens is given by eq. 1. Substituting from eq. 1 into eq. 6 we obtain eq. 7:

|  |  | (7) |
| --- | --- | --- |

To find the minimum period *p*min we must substitute the maximum aperture radius *r* of the metalens. In our case, with the stop located at the lens front focal plane, this is given by eq. 8 (see fig. S4):

|  |  | (8) |
| --- | --- | --- |

Where *f* is the lens focal length, *θ* the field-of-view angle, and *rstop* is the radius of the aperture stop, in our case 1.35/2=0.675mm.


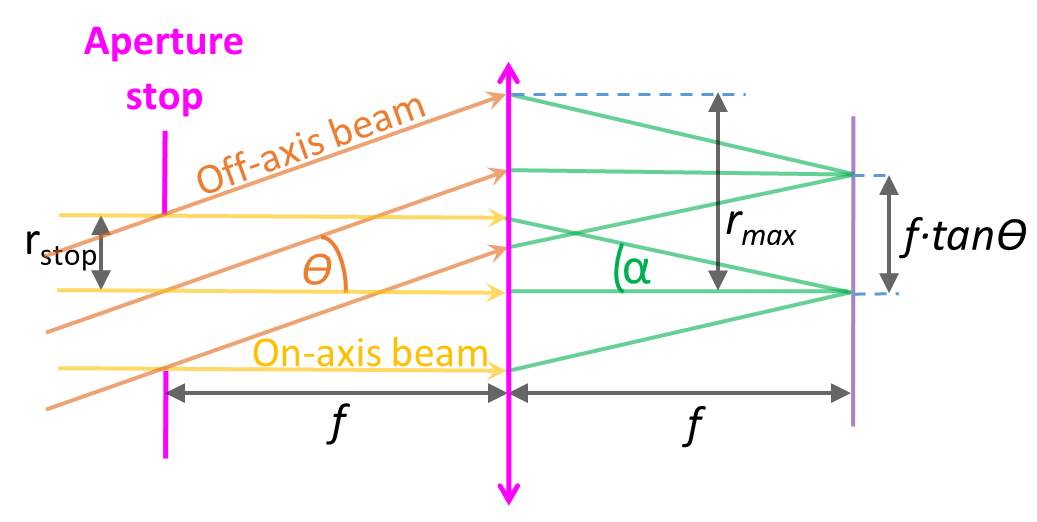


**Fig. S4** Geometry for wide-FOV metalens lattice period calculation

The required lattice period is then one quarter of *p*min, based on our sampling criterion.

The maximum lattice period, calculated based on the sub-wavelength and phase sampling considerations, is shown in fig. S5. The crossing point of the two graphs comes out at a field angle of 15˚ and lattice period of 455nm.


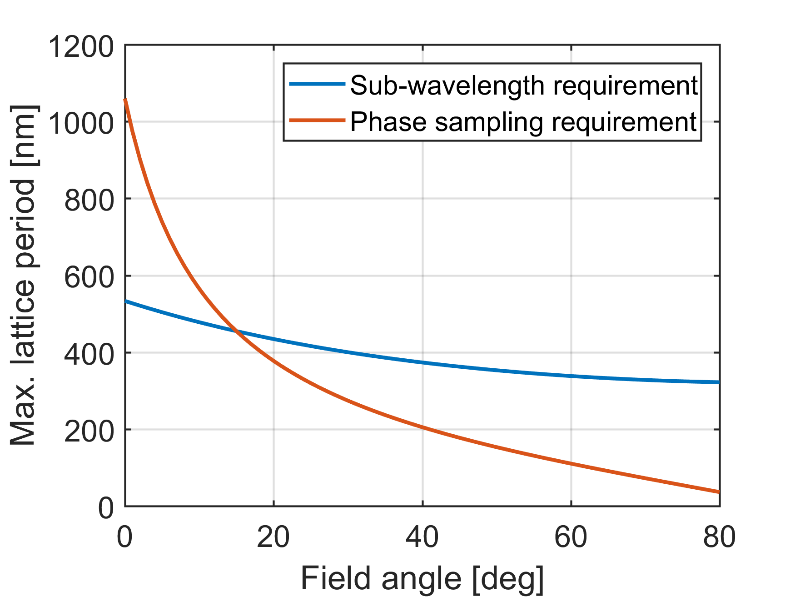


**Fig. S5** Maximum metalens lattice period as a function of field angle

Hexagonal lattice

In our metalens we used a hexagonal lattice, as shown in fig. S6. The lattice constant is p, but the effective periods in the y and x directions are and . The maximum lattice period calculated above must be applied to *px*, the larger of the two. In our metalens we used a hexagonal lattice period *p* of 500nm. This means that *px*=433nm. Based on fig. S5 we can meet this sampling criterion for field angles up to 16.25˚, limited by the phase sampling criterion.


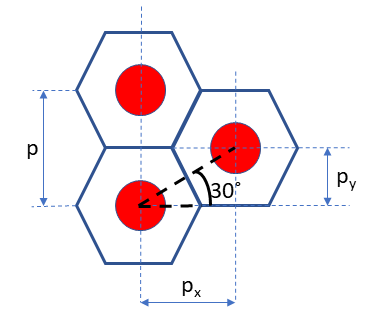


**Fig. S6** Hexagonal array effective periods

The above analysis was used to provide an estimate of the appropriate lattice constant for a given design. It gives only the upper limit for the lattice period, and not the lower limit (which is driven by antenna coupling). It was therefore followed by accurate FDTD analysis of the periodic antenna structures, and approximate scalar simulation of diffraction efficiency, as detailed in the main part of the paper.

# Field plots showing magnetic and electric dipole resonances

The transmission of the nanoantennas as a function of radius and wavelength was shown in fig. 2(b) of the main text. It can be seen from there that the overlap of the magnetic and electric dipole resonances (Kerker condition) occurs at our design wavelength (850nm) when the antenna radius is approximately 150nm (the simulated antenna height is constant at 140nm). In this state we have a mixture of magnetic and electric resonances. The spectral transmission and fields for this state were simulated in Lumerical software and are shown in figure S7. The simulation is for x-polarized incident light, and propagation in the z-axis direction (y-polarization would give the same result, since the structure is symmetrical). The vertical asymmetry in the Ex field is a result of the overlap with the magnetic resonance, which is associated with an azimuthal electric field, i.e. a positive Ex field at the bottom of
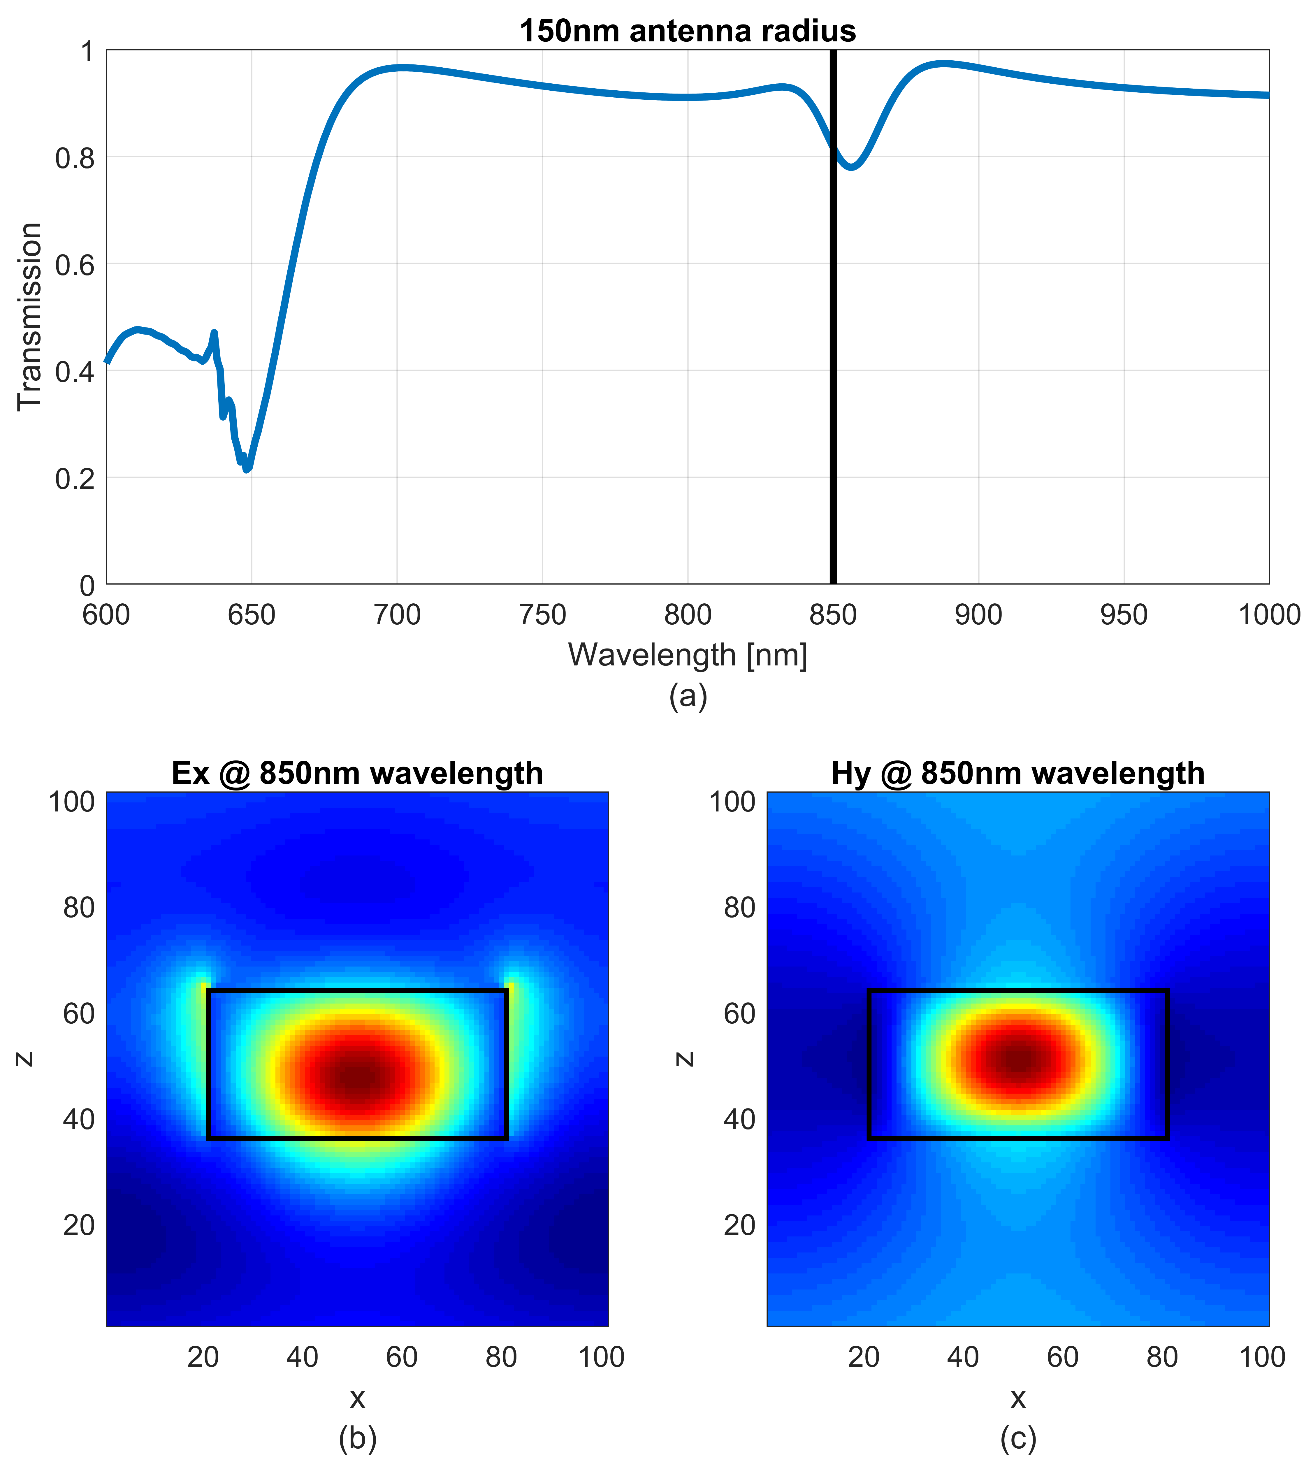
the antenna, and a negative Ex field at the top of the antenna.

**Fig. S7** Transmission and fields at the nominal design wavelength (850nm) and intermediate antenna radius (150nm). (a) Spectral transmission showing that as a result of the overlap of the electric and magnetic dipole resonances the transmission is near unity over the entire spectral range (there is a small dip, since the resonance spectral widths and shape are not identical). (b) Electric field in X direction, showing the electric dipole resonance. (c) Magnetic field in Y direction, showing the magnetic dipole resonance. The axes are labeled by pixel number, where each pixel is 5nm. The black rectangle represents the antenna dimensions.

If we look at a radius of 180nm (top of graph in fig.2(b) of the main text), we can see that the magnetic and electric dipole resonances no longer overlap. In figure S8 we show the spectral transmission and field plots for this situation, where we can see the separation of the electric and magnetic dipole resonance.


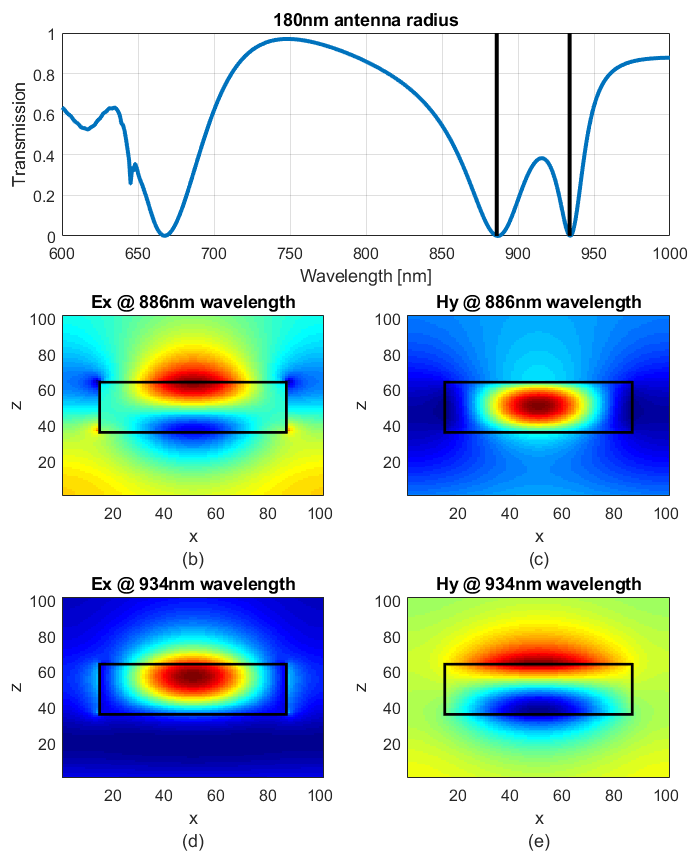


**Fig. S8** Transmission and fields at wavelengths of magnetic (886nm) and electric (934nm) dipole resonances for 180nm antenna radius. (a) Spectral transmission showing the two resonances. (b-c) Electric and magnetic field, showing the magnetic dipole resonance. (d-e) Electric and magnetic field showing the electric dipole resonance. The axes are labeled by pixel number, where each pixel is 5nm. The black rectangle represents the antenna dimensions.

# Fraunhofer approximation for metalens PSF

Assuming a plane wave incident on a lens, the PSF can be accurately evaluated based on the Fraunhofer approximation of the diffraction integral at the focal plane of the lens  [8]. However, in the case of our metalens the focal plane is different for each wavelength. We are evaluating the PSF of each wavelength at a common image plane, which is located somewhere in between the focal planes of the various wavelengths (at the location which gives an optimal total PSF). The question is, can we still use the Fraunhofer approximation when calculating the chromatic defocused PSFs?

The condition for validity of the Fraunhofer approximation in the case of a converging beam is given in [9] as:

|  |  | (9) |
| --- | --- | --- |

Where *x2*max is the maximum radial spot size at the image plane, and *z* is the propagation distance (in our case approximately equal to the focal length). If we substitute *λ=850nm* and *z=f=3.36mm* into eq. 9, we obtain the condition *x2*max*<250µm.* We can easily estimate our maximum spot size radius based on geometrical optics considerations. The metalens longitudinal chromatic aberration is given by , and we multiply by the tangent of the marginal ray angle (α in fig. S5) to obtain the lateral aberration [10]. The largest spectral range we simulated was 40nm FWHM. The *Δλ* should be half the total wavelength range, since the image plane is situated approximately in the middle. However, we also used wavelengths beyond the half-max point, so it is a good approximation to use *Δλ=40nm.* This gives us *Δf≈3.36·40/850·0.2=32µm*. This is far below 250µm, so we can use the Fraunhofer approximation.

# The importance of outdoor imaging for metalens characterization


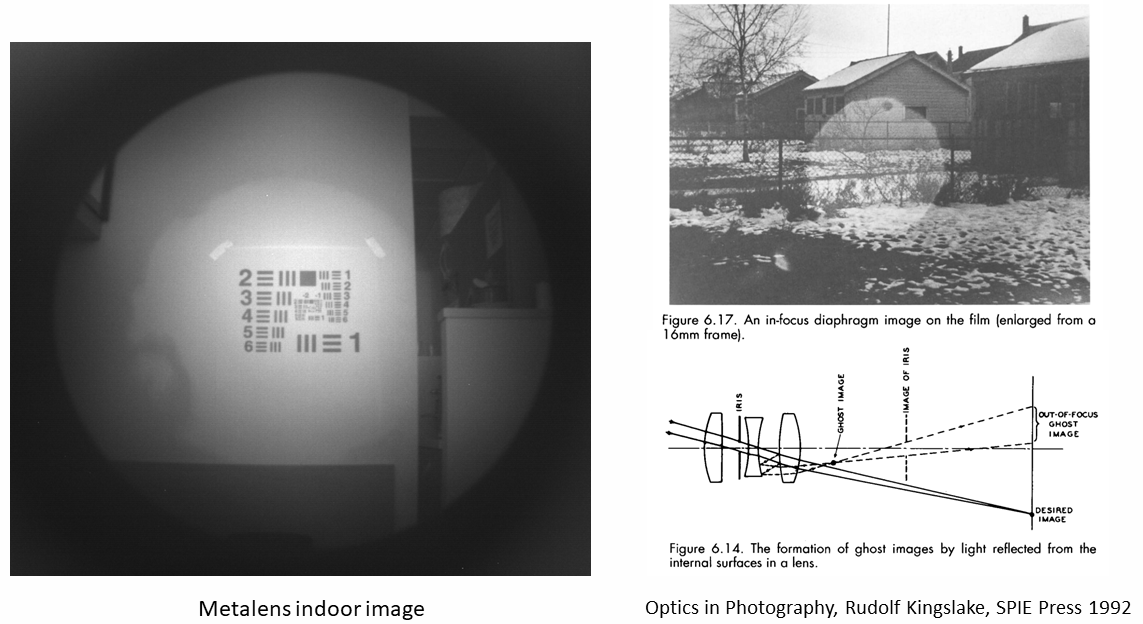


**Fig. S9** Left - Indoor image of resolution target showing flare artifact (central bright circle with jagged edges). Right – Figures from [11] showing the effect and its cause.


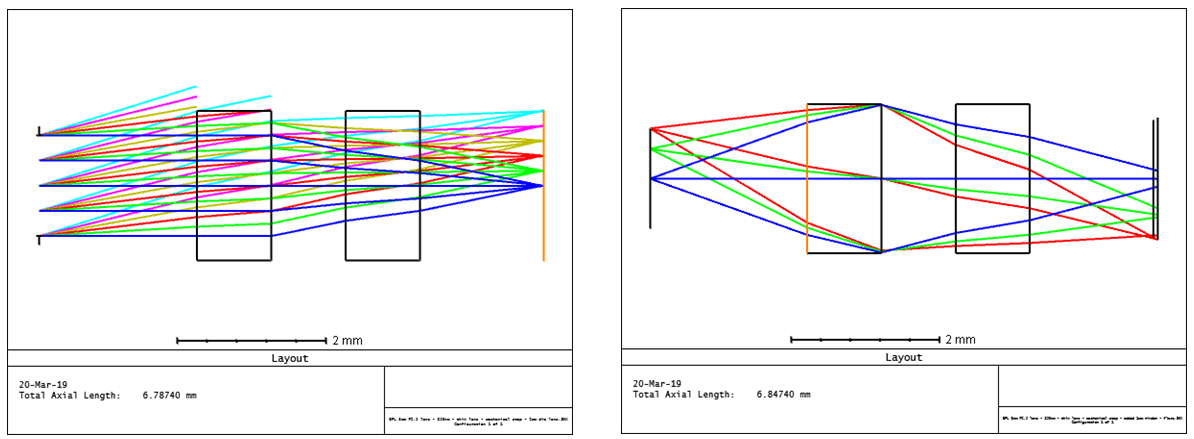


**Fig. S10** Left – Normal first diffraction order operating mode of metalens, with distant object imaged on sensor. Right - Metalens operating in second diffraction order, with iris imaged on sensor (2f-2f configuration).

In continuation of the discussion in the 'Outdoor imaging' section of the paper, we would like to ask why is the flare artifact present in the indoor image and not in the outdoor image? In fact, it can be seen also in outdoor images. A very careful look at of the image of fig. 6 can reveal it. The main reason it cannot be seen easily in the outdoor image is that much more texture exists in the outdoor image than in our indoor image. The higher contrast of the image texture masks the edges of the iris image. There is also some influence of the distribution of the scene illumination inside and outside the FOV. The illumination reaching the iris ghost image comes from different angles as compared to the angles related to the object being imaged.

Can the flare artefact be seen in the lab? In principle yes, put for practical reasons it will often go unnoticed. The reason for this is that when performing testing in the lab it is very difficult to illuminate the entire FOV of the imaging system, and it is even more difficult to illuminate beyond the FOV. However, many stray light artefacts are only seen under such illumination. A possible solution is to put the entrance aperture of the imaging system at the output port of an integrating sphere. However, to combine this with viewing an in-focus image of a resolution target is challenging.

At this point we have not performed further quantitative analysis of the video image. From a resolution point-of-view, this has been characterized via the MTF measurement. Since we are not interested in the sensor MTF, there is no point in measuring resolution on the video image. What we would like to analyze in the future is the signal-to-noise (SNR) ratio of the image. In particular, the dependence of SNR on the spectral band-pass used is of interest, since this will allow us to compare the results to the theory presented in our previous paper [10].

# Comparison of Huygens metalens to commercial lens

In order to get a qualitative feeling for the performance of our metalens, we compared it to a commercial lens: Lensation 3.7mm F/1.8 (model Lensagon BPM3718). We imaged a printed resolution target posted on the wall at about 65cm distance (same distance for all images). The obtained images are shown in Fig. S11. The two images on the left (of the Lensation lens and our metalens) are with no post-processing other than cropping.

| Lensation | Metalens | Metalens enhanced |
| --- | --- | --- |
| 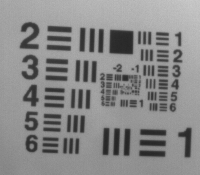 | 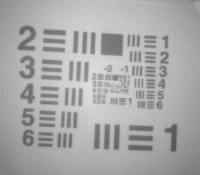 | 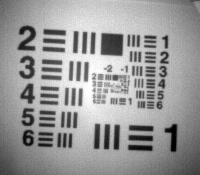 |

**Fig. S11** Left –commercial lens image, center - metalens image, right – contrast enhanced metalens image.

The images were taken through an 800nm band-pass filter, 10nm FWHM (Thorlabs FB800-10), the same as used in fig. 6. Based on the resolution group that can be resolved, the resolution in the object plane is quite similar for both lenses, despite the slightly larger focal length of the commercial lens which gives it a small advantage (3.7mm compared to 3.36mm). This is expected, since the pixel size of the Thorlabs DCC1545M camera is 5.2µm, meaning its’ Nyquist frequency is about 100c/mm. At this frequency our metalens has above 40% MTF, so the resolution is limited by the camera pixel. Assuming this is also the case for the commercial lens, it is expected that the resolution of the commercial lens will be better by a factor equal to the focal length ratio, i.e. 3.7/3.36=1.1, i.e. 10% better.

The main disadvantage of the metalens is the “milkyness” of the picture, whose quantitative measure is “veiling glare”, defined as (The black level is taken from the black square in the resolution target, and the white from the background level. The black and white levels are measured relative to the “capped black”, i.e. the graylevel when no light reaches the camera). Based on the above pictures the VG values come out to be 20% for the commercial lens, and 60% for the metalens. This is a result of the strong zero-order that passes through in our metalens (with better manufacturing this can be improved drastically). Of course, the milkyness can be easily improved by a simple contrast enhancement operation (bring the graylevel of the darkest area down, and then apply gain to bring the brightest area back up), at the expense of SNR. The result of such contrast enhancement is shown on the right panel of Fig. S11.

We can also estimate the transmission of our metalens compared to the commercial lens by comparing the exposure times needed to obtain the same white level (we set the exposure to obtain a white-level of 200 in both lenses), and accounting for the difference in F#:

We obtained a relative transmission of 65% for our lens compared to the Lensation lens (this includes all transmitted light, i.e. mostly the first and zero order, which explains why it is higher than the efficiency of the lens).

Of course, the commercial lens also gives a wider field of view than our metalens – this is not visible in the above cropped images. A metalens with improved FOV can be obtained by using a truncated-waveguide or geometrical phase type antenna.

# Comparison of wide-FOV metalenses

As of today, very few wide-field-of-view metalenses have been demonstrated. In table S1 we compare the Huygens type metalens presented in this paper to previously presented truncated waveguide type  [1] and geometrical phase type  [12] wide-FOV metalenses.

| Parameter\Type | Huygens | Truncated waveguide | Geometrical phase |
| --- | --- | --- | --- |
| Design wavelength | 850nm | 850nm | 532nm |
| Antenna material | a-Si | a-Si | TiO2 |
| Focal length [mm] | 3.36 | 0.717 | 0.34 |
| F# | 2.5 | 0.9 | 1 |
| # of Elements | 1 | 2 | 2 |
| FOV - full | 30˚ | 60˚ | 50˚ |
| Resolution in image plane [c/mm] | 300 | 800 | 1100 |
| Resolution in object space [degrees] | 0.06˚ | 0.1˚ | 0.15˚ |
| Efficiency (on-axis) | 20% | 70% | 50% for CP light  25% for unpolarized light |

**Table S1** Comparison of demonstrated wide FOV metalenses

Our main conclusions from the comparison are:

1. Our Huygens type metalens is more limited in its FOV compared to the other types, as a result of the angular sensitivity of the antenna response. On the other hand, the antenna aspect ratio is smaller, so if a 30˚ FOV is sufficient, Huygens type may be a good option.

2. The metalens presented in our paper has parameters that are more suited for practical photographic applications (longer focal length and higher F#). Therefore, despite the higher image space resolution of the other lenses (resulting mostly from the lower F#), our lens obtains the highest angular resolution in the object space. This is not inherent in the type of metalens, but simply a result of the parameters chosen for the design.

3. An advantage of using a higher F# is that a single metalens element is sufficient to obtain near diffraction limited performance.

4. The best efficiency for unpolarized light is obtained with truncated waveguide type antennas.

# References

1. A. Arbabi, E. Arbabi, S. M. Kamali, Y. Horie, S. Han, and A. Faraon, "Miniature optical planar camera based on a wide-angle metasurface doublet corrected for monochromatic aberrations," Nat. Commun. **7**, 13682 (2016).

2. W. T. Chen, A. Y. Zhu, M. Khorasaninejad, Z. Shi, V. Sanjeev, and F. Capasso, "Immersion Meta-Lenses at Visible Wavelengths for Nanoscale Imaging," Nano Lett. **17**, 3188–3194 (2017).

3. E. (Adelphi U. Hecht, *Optics*, 4th ed. (Addison-Wesley, 2002).

4. A. Yariv and P. Yeh, *Photonics - Optical Electronics in Modern Communications*, Sixth Ed. (Oxford University, 2007).

5. D. D. O’Shea, T. J. Suleski, A. D. Kathman, and D. W. Praather, *Diffractive Optics* (SPIE Press, 2003).

6. P. Lalanne and P. Chavel, "Metalenses at visible wavelengths : past , present , perspectives," Laser Photonics Rev. **11**, 1600295 (2017).

7. *Oslo Optics Reference* (Lambda Reseach Corp., 2011).

8. J. W. Goodman, *Introduction to Fourier Optics*, 2nd ed. (McGraw-Hill, 1996).

9. Y. M. Engelberg and S. Ruschin, "Fast method for physical optics propagation of high - numerical - aperture beams," JOSA A **21**, 2135–2145 (2004).

10. J. Engelberg and U. Levy, "Optimizing the spectral range of diffractive metalenses for polychromatic imaging applications," Opt. Express **25**, (2017).

11. R. Kingslake, *Optics in Photography* (SPIE Press, 1992).

12. B. Groever, W. T. Chen, and F. Capasso, "Meta-lens doublet in the visible region," Nano Lett. **17**, 4902–4907 (2017).
